# Supplementary material for: Pemetrexed induces ROS generation and cellular senescence by attenuating TS‐mediated thymidylate metabolism to reverse gefitinib resistance in NSCLC
Source: PubMed Central journal article supplement (PMC10339075; doi:10.1111/jcmm.17799), 2023-06-06
Supplement: JCMM-27-2032-s001.pdf [file JCMM-27-2032-s001.pdf]

Table S1. Primer sequences used in this study.

| Name            | Primer                   |
|-----------------|--------------------------|
| GAPDH F         | TGGTCACCAGGGCTGCTT       |
| GAPDH R         | AGCTTCCC GTTCTCAGCCTT    |
| TS F            | GGGACTTGGGCCAGTTTAT      |
| TS R            | CTTCTGTCGTCAGGGTTGGT     |
| IL-1 $\alpha$ F | AGTAGCAACCAACGGGAAGG     |
| IL-1 $\alpha$ R | AAGGTGCTGACCTAGGCTTG     |
| IL-1 $\beta$ F  | GCCATGGACAAGCTGAGGAA     |
| IL-1 $\beta$ R  | TCGTTATCCCATGTGTCGAAGA   |
| IL6 F           | ACTCACCTCTTCAGAACGAATTG  |
| IL6 R           | CCATCTTTGGAAGGTT CAGGTTG |
| IL8 F           | CTGAGAGTGATTGAGAGTGGAC   |
| IL8 R           | ACCCTCTGCACCCAGTTTTC     |

Table S2. ORF sequences for TS over expression and targeted sequences for TS knockdown.

| Clone Name                      | Target Sequence                                                                                                                                                                                                                                                                                                                                                                                                                                                                                                                                                                                                                                                                                                                                                                                                                                                                                                                                                                                                                                  |
|---------------------------------|--------------------------------------------------------------------------------------------------------------------------------------------------------------------------------------------------------------------------------------------------------------------------------------------------------------------------------------------------------------------------------------------------------------------------------------------------------------------------------------------------------------------------------------------------------------------------------------------------------------------------------------------------------------------------------------------------------------------------------------------------------------------------------------------------------------------------------------------------------------------------------------------------------------------------------------------------------------------------------------------------------------------------------------------------|
| ORF Sequence Information for TS | ATGCCTGTGGCCGGCTCGGAGCTGCCGCGCCGGCCCTGCCCCCGCCGCACAG<br>GAGCGGGACGCCGAGCCGCGTCCGCCGCACGGGGAGCTGCAGTACCTGGGGCAG<br>ATCCAACACATCCTCCGCTGCGGCGTCAGGAAGGACGACCGCACGGGCACCGGC<br>ACCCTGTCCGTATTTCGGCATGCAGGCGCGCTACAGCCTGAGAGATGAATTCCCT<br>CTGCTGACAACCAAACGTGTGTTCTGGAAGGGTGT TTTGGAGGAGTTGCTGTGG<br>TTTATCAAGGGATCCACAAAATGCTAAAGAGCTGTCTTCCAAGGGAGTGAAAATC<br>TGGGATGCCAATGGATCCCGAGACTTTTTGGACAGCCTGGGATTCTCCACCAGA<br>GAAGAAGGGGACTTGGGCCAGTTTATGGCTTCCAGTGGAGGCATTTTGGGGCA<br>GAATACAGAGATATGGAATCAGATTATTCAGGACAGGGAGTTGACCAACTGCAA<br>AGAGTGATTGACACCATCAAAAACCAACCCTGACGACAGAAGAATCATCATGTGC<br>GCTTGGAATCCAAGAGATCTTCCTCTGATGGCGCTGCCTCCATGCCATGCCCTC<br>TGCCAGTTCTATGTGGTGAACAGTGAGCTGTCCCTGCCAGCTGTACCAGAGATCG<br>GGAGACATGGGCCTCGGTGTGCCTTTCAACATCGCCAGCTACGCCCTGCTCAG<br>TACATGATTGCGCACATCACGGGCCTGAAGCCAGGTGACTTTATACACACTTG<br>GGAGATGCACATATTTACCTGAATCACATCGAGCCACTGAAAATTCAGCTTCAG<br>CGAGAACCCAGACCTTTCCCAAAGCTCAGGATTCTTCGAAAAGTTGAGAAAATT<br>GATGACTTCAAAGCTGAAGACTTTCAGATTGAAGGGTACAATCCGCATCCAAC<br>ATTAAAATGGAATGGCTGTTTAG |
| sh-TS a                         | GGGATTCTCCACCAGAGAAGA                                                                                                                                                                                                                                                                                                                                                                                                                                                                                                                                                                                                                                                                                                                                                                                                                                                                                                                                                                                                                            |
| sh-TS b                         | GACAACCAAACGTGTGTTCTG                                                                                                                                                                                                                                                                                                                                                                                                                                                                                                                                                                                                                                                                                                                                                                                                                                                                                                                                                                                                                            |
